# Supplementary material for: Aqueous synthesis of type-II core/shell CdTe/CdSe quantum dots for near-infrared fluorescent sensing of copper(ii)
Source: Royal Society of Chemistry journal article supplement (doi:10.1039/b801963k), 2008-01-01
Supplement: b801963k.pdf [file b801963k.pdf]

## Electronic Supplementary Information

### Aqueous synthesis of type-II core/shell CdTe/CdSe quantum dots for near-infrared fluorescent sensing copper (II)

Yunsheng Xia and Changqing Zhu\*

*Anhui Key Laboratory of Chemo-Biosensing, College of Chemistry and Materials Science, Anhui  
Normal University, Wuhu 241000, PR China*

#### Experimental Procedures

##### Analytical Applications

The proposed method was applied to the determination of Cu (II) ions in tea and fountain water samples. Tea samples were processed according to the method reported previously.<sup>1</sup> Briefly, tea samples were washed sequentially with water, acetone, and 1.0 % (w/v) sodium dodecyl sulfate solution and then immersed for 30 min to remove excess contamination. This washing procedure was repeated twice. Then, they were dried at 50 °C. 1.000 g and 10.000 g of tea were weighted and placed into a muffle, respectively, and heated at 500 °C for 1.5 h. The obtained residue was cooled to room temperature. After adding a little water and HNO<sub>3</sub>, it was moved into 25-mL volumetric flask and made up to the mark with DDW. Fountain water samples were filtered three times through qualitative filter paper before detection.

#### Supporting Results

Table S1. The fit results of fluorescence decays and fluorescence quantum yields of CdTe/CdSe QDs with the increasing of CdSe shell.

| Emission peak (nm) | A    | B <sub>1</sub> | τ <sub>1</sub> | B <sub>2</sub> | τ <sub>2</sub> | B <sub>3</sub> | τ <sub>3</sub> | χ <sup>2</sup> | FL QY (%) |
|--------------------|------|----------------|----------------|----------------|----------------|----------------|----------------|----------------|-----------|
| 640.7              | 1.43 | 947.4          | 7.80           | 1693           | 22.34          | 265.4          | 56.89          | 1.093          | 18.5      |
| 680.3              | 1.96 | 472.4          | 16.50          | 2079           | 41.89          | 388.5          | 99.33          | 1.165          | 17.3      |
| 703.4              | 1.43 | 639.4          | 24.55          | 2137           | 60.48          | 148.7          | 162.6          | 1.063          | 15.2      |
| 732.6              | 1.93 | 432.8          | 31.23          | 2302           | 78.38          | 208.1          | 201.6          | 1.060          | 13.8      |
| 752.2              | 3.96 | 467.9          | 45.70          | 2132           | 91.93          | 333.8          | 204.3          | 1.071          | 11.4      |

Table S2 Test of the interference of different ions with the fluorescence intensity of CdTe/CdSe QDs ( $\lambda_{\text{Em}} = 752.2$  nm).

| Coexisting substances | Coexisting concentration ( $\mu\text{M}$ ) | Change of fluorescence intensity (%) |
|-----------------------|--------------------------------------------|--------------------------------------|
| $\text{K}^+ (*)$      | 50.0                                       | -1.8                                 |
| $\text{Na}^+ (*)$     | 50.0                                       | -1.5                                 |
| $\text{Mg}^{2+} (*)$  | 30.0                                       | -2.1                                 |
| $\text{Co}^{2+} (*)$  | 18.5                                       | -2.4                                 |
| $\text{Fe}^{3+} (*)$  | 14.2                                       | -3.2                                 |
| $\text{Mn}^{2+} (*)$  | 24.0                                       | +4.0                                 |
| $\text{Ca}^{2+} (*)$  | 20.0                                       | +3.8                                 |
| $\text{Zn}^{2+} (*)$  | 12.5                                       | +4.0                                 |
| $\text{Hg}^{2+}$      | 0.20                                       | -3.7                                 |
| $\text{Ag}^+$         | 0.30                                       | -3.4                                 |
| $\text{SO}_4^{2-}$    | 10.0                                       | +1.8                                 |
| $\text{CO}_3^{2-}$    | 12.0                                       | +2.4                                 |
| $\text{F}^-$          | 12.0                                       | -1.5                                 |
| $\text{Br}^-$         | 12.0                                       | -2.0                                 |
| $\text{I}^-$          | 10.0                                       | -2.2                                 |

Concentration of  $\text{Cu}^{2+}$ : 0.5  $\mu\text{M}$ . Other conditions are the same as those described in the procedure.

“\*” represents physiologically relevant cations.<sup>5,6</sup>

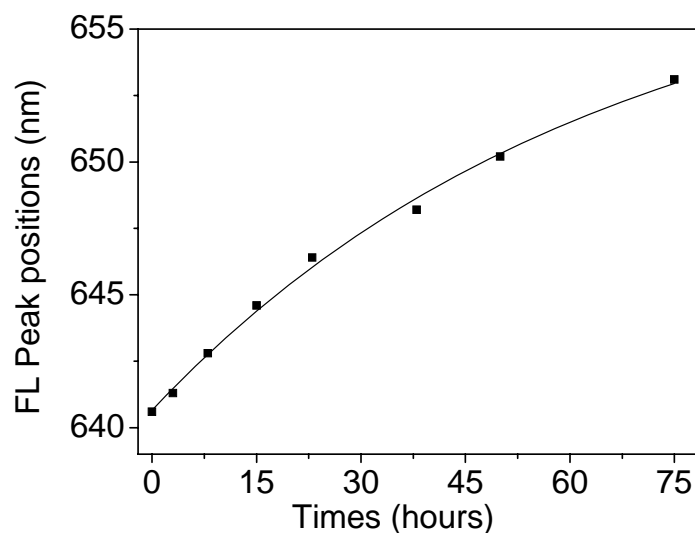

Fig. S1 Temporal fluorescence peak positions evolution of CdTe QD cores obtained during reflux of the colloidal solution at 78 °C.

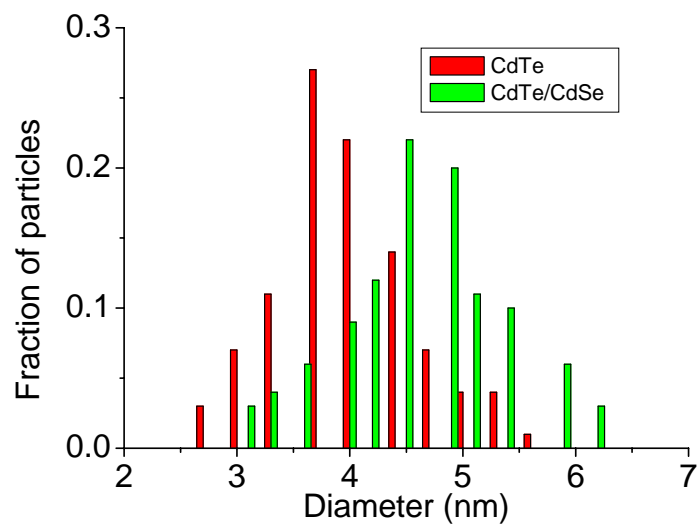

Fig. S2 Size histogram of CdTe QD and CdTe/CdSe QDs. The TEM images are shown in Fig. 1.

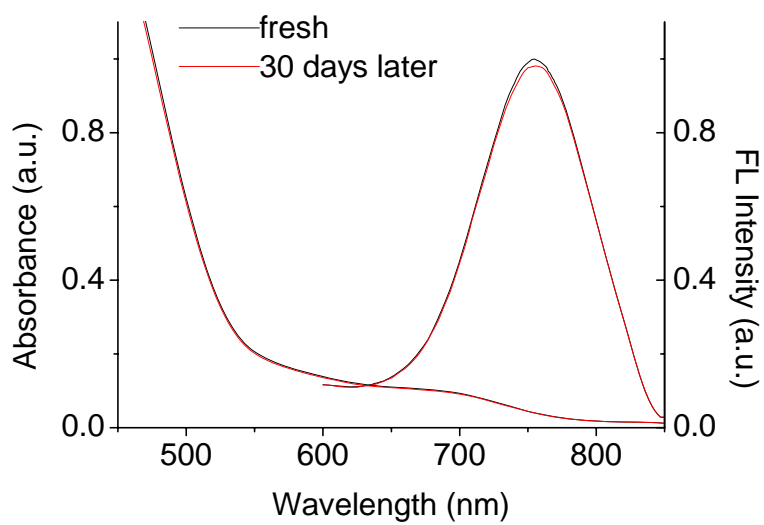

Fig. S3 The stability of CdTe/CdSe QDs.

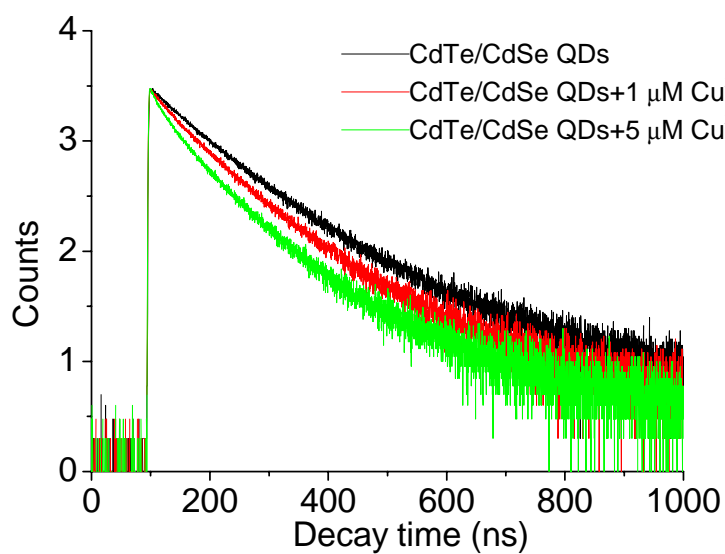

Fig. S4 Fluorescence decay curves of CdTe/CdSe QDs in the absence and presence of Cu (II) ions, which were recorded at the 752.2 nm with the excitation wavelength of 400 nm.

## References

1. Y. Lai, Y. Yu, P. Zhong and J. Wu, *Anal. Lett.*, 2006, **39**, 1201.
2. Y. Chen and Z. Rosenzweig, *Anal. Chem.*, 2002, **74**, 5132.
3. B. Tang, J. Niu, C. Yu, L. Zhuo and J. Ge, *Chem. Commun.*, 2005, 4184.
